# Supplementary material for: Sequence and comparative analysis of the chicken genome provide unique perspectives on vertebrate evolution
Source: Springer Nature journal article supplement (doi:10.1038/nature03154), 2004-12-09

Sequence Conservation at 'U2' Splice Sites (aligned introns + unaligned background)

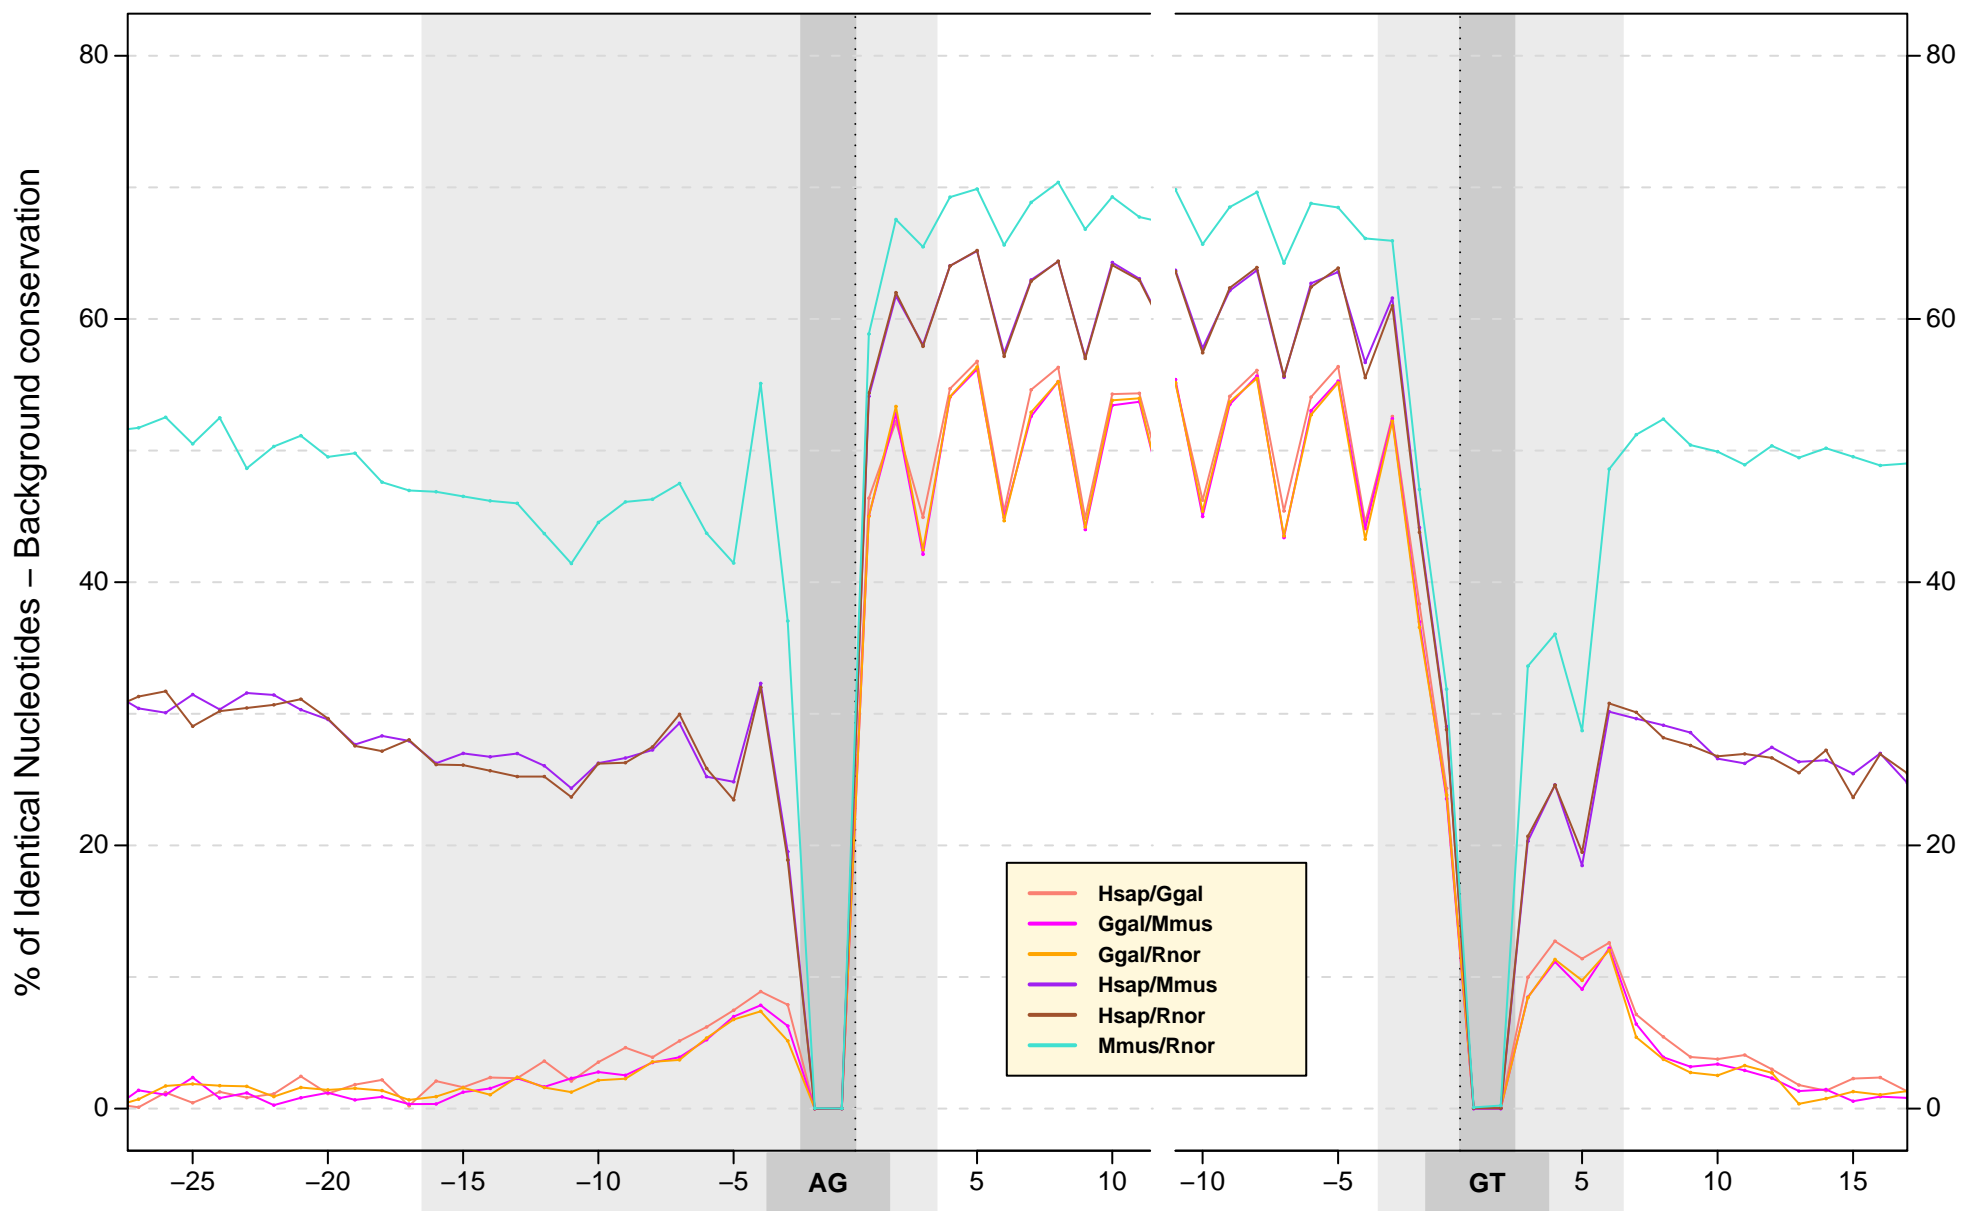

Nucleotide Position Relative to Acceptor and Donor Splice Sites (in bp)

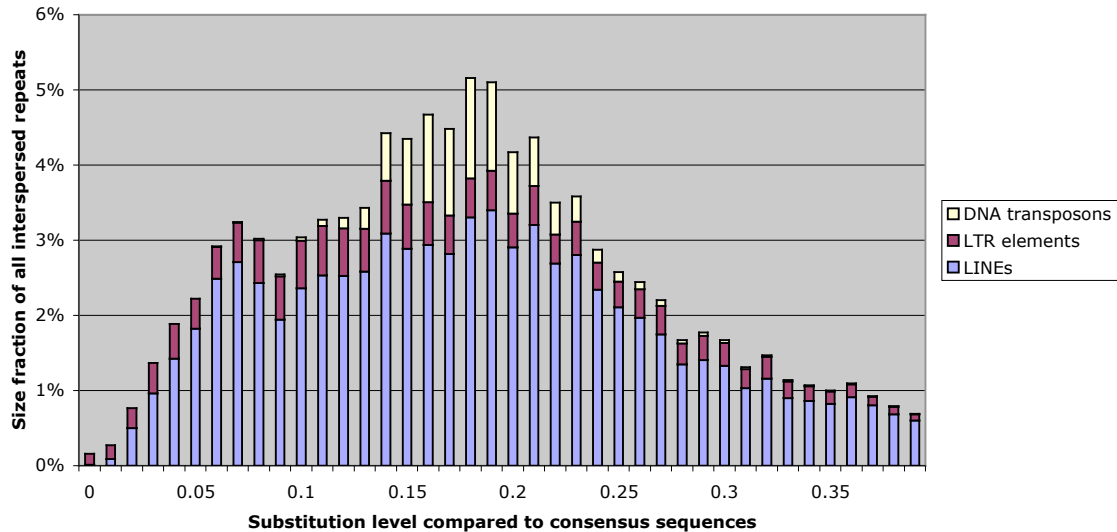

**Distribution of CR1 and L1 insertion sizes**

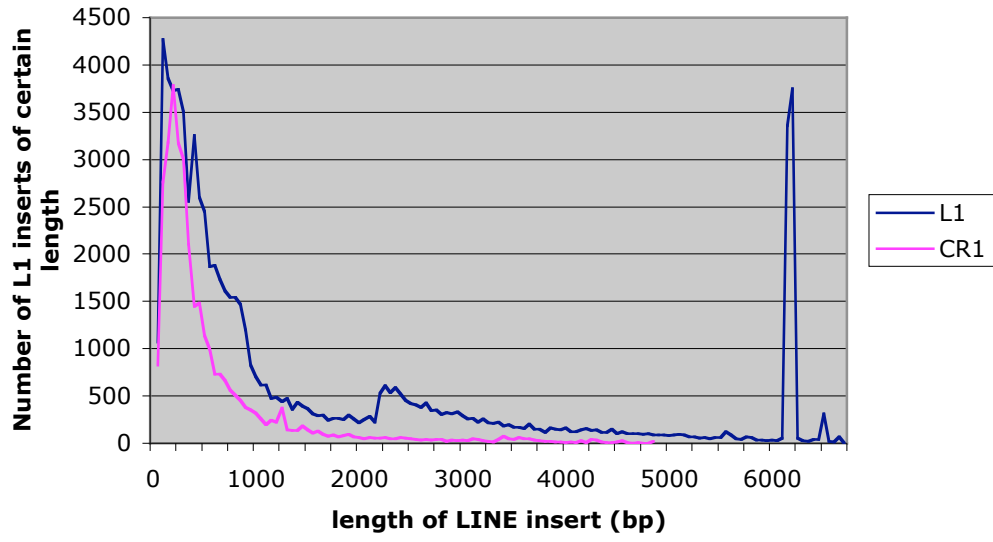

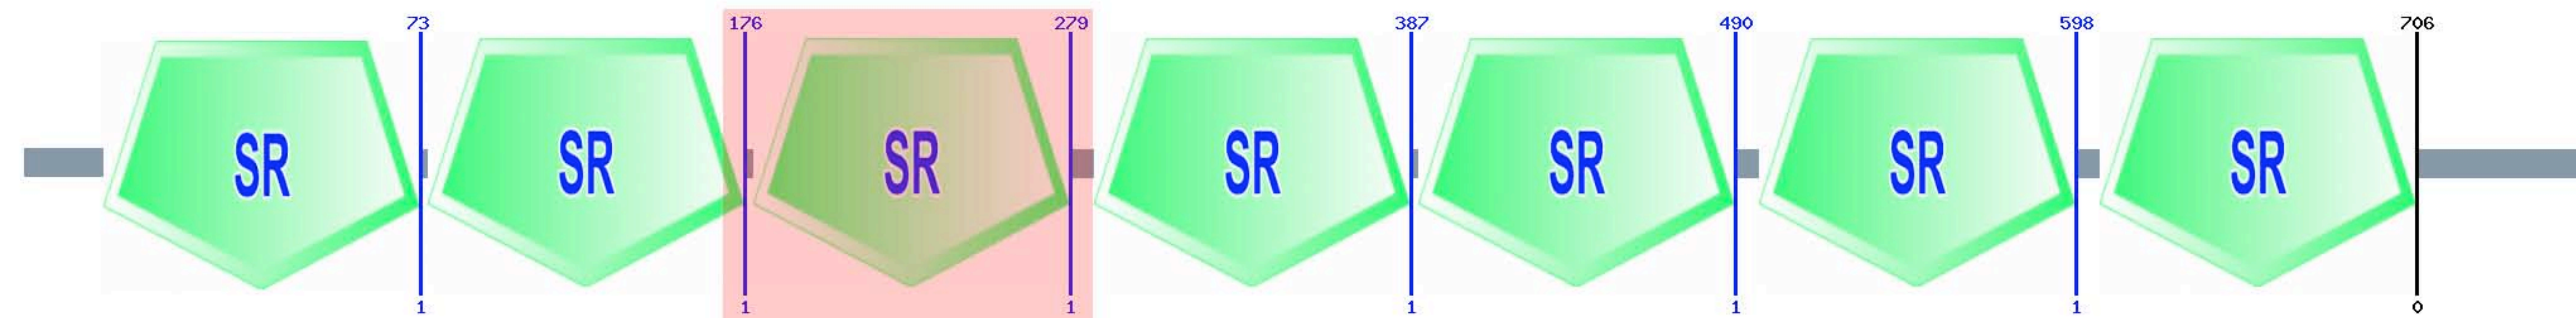

**ENSGALP00000014869**

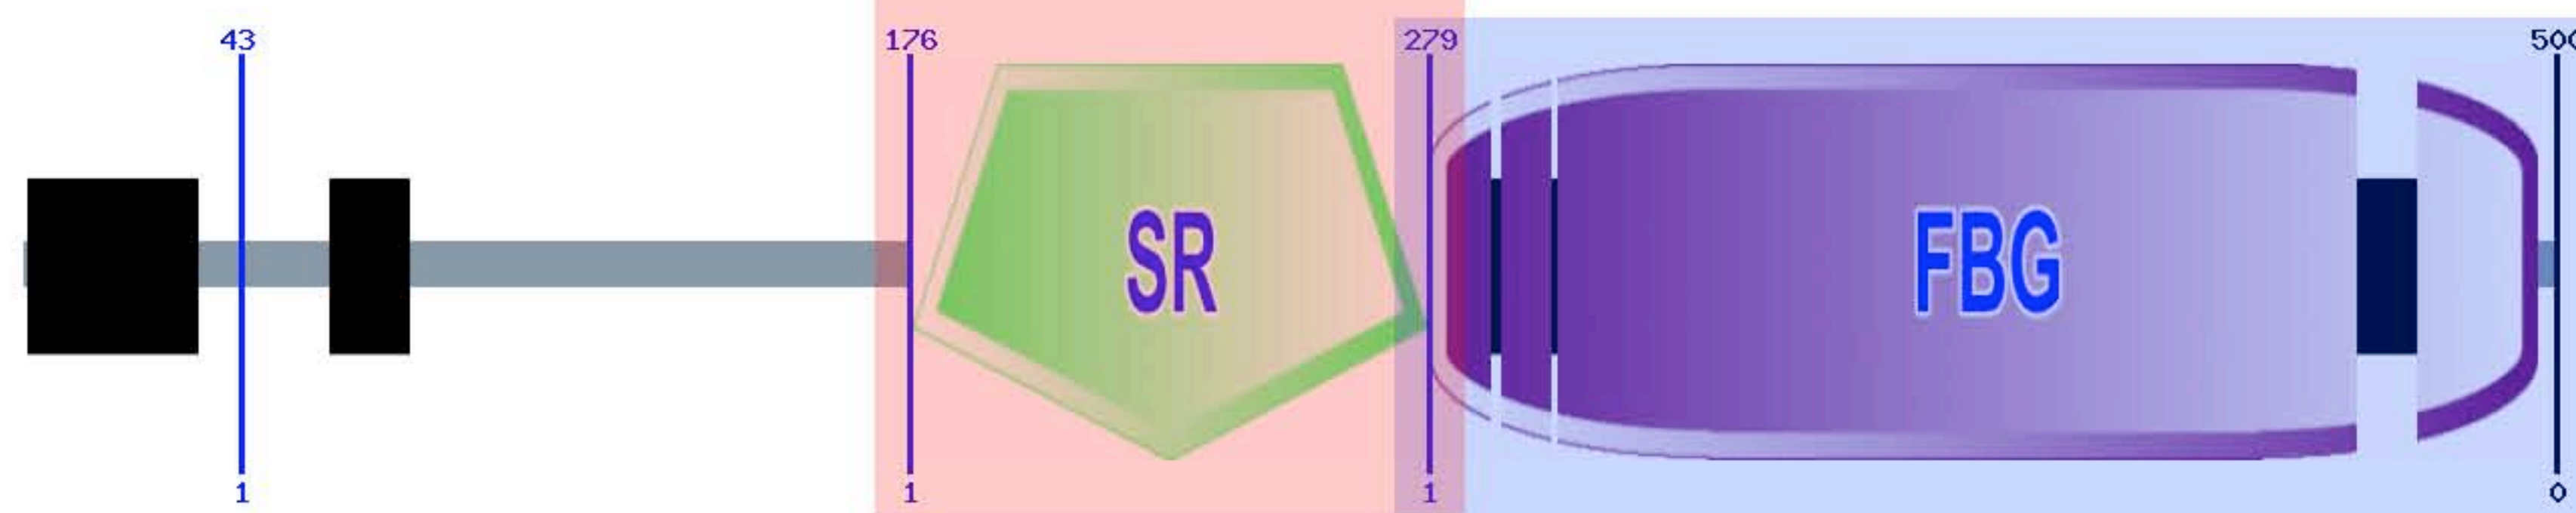

**ENSGALP00000001164**

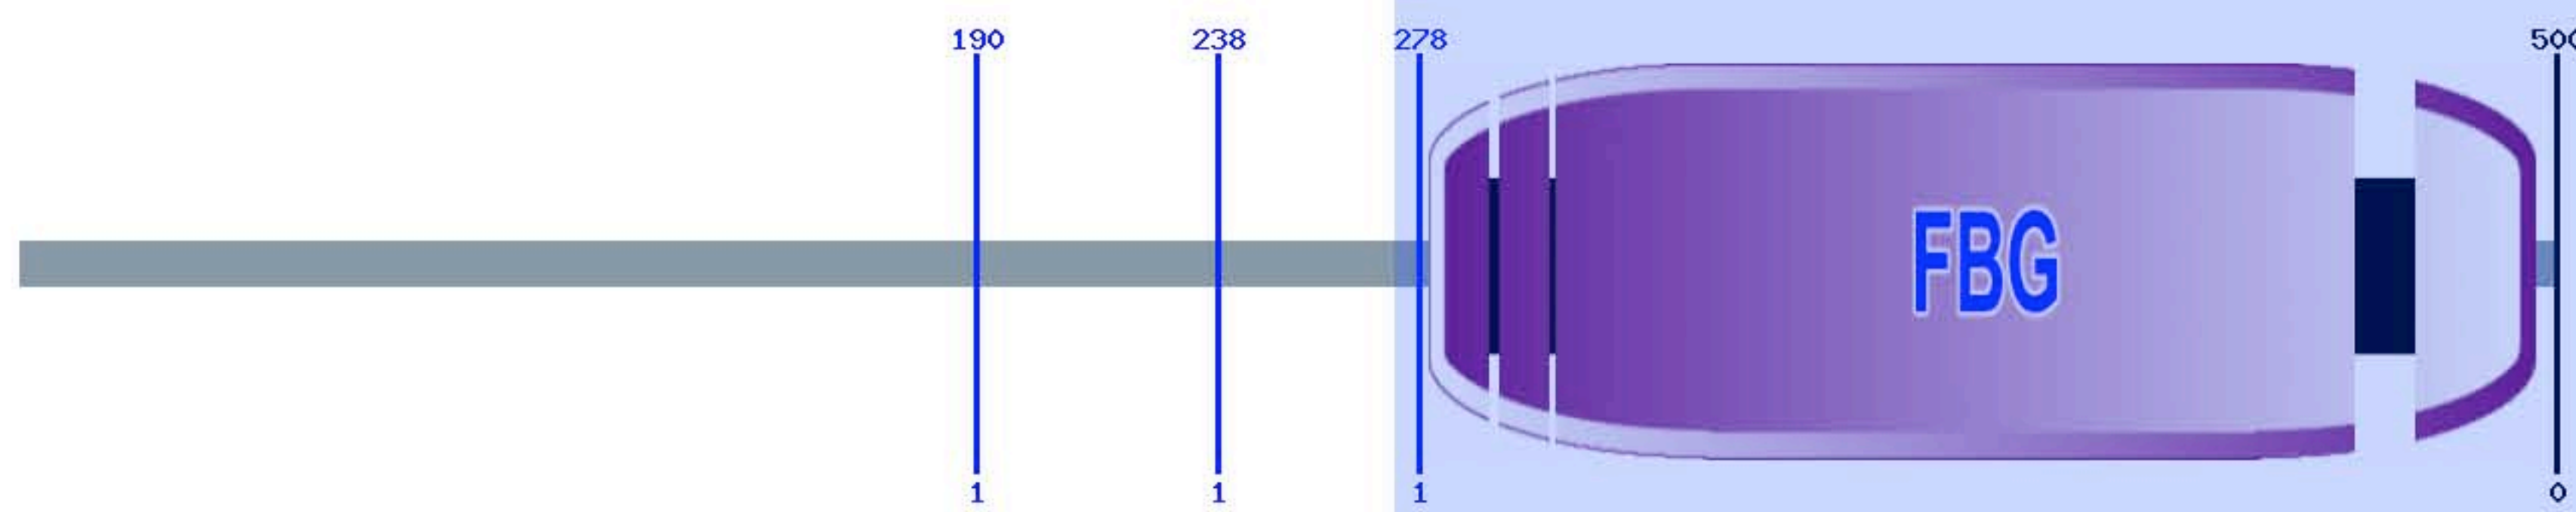

**ENSGALP00000001042**

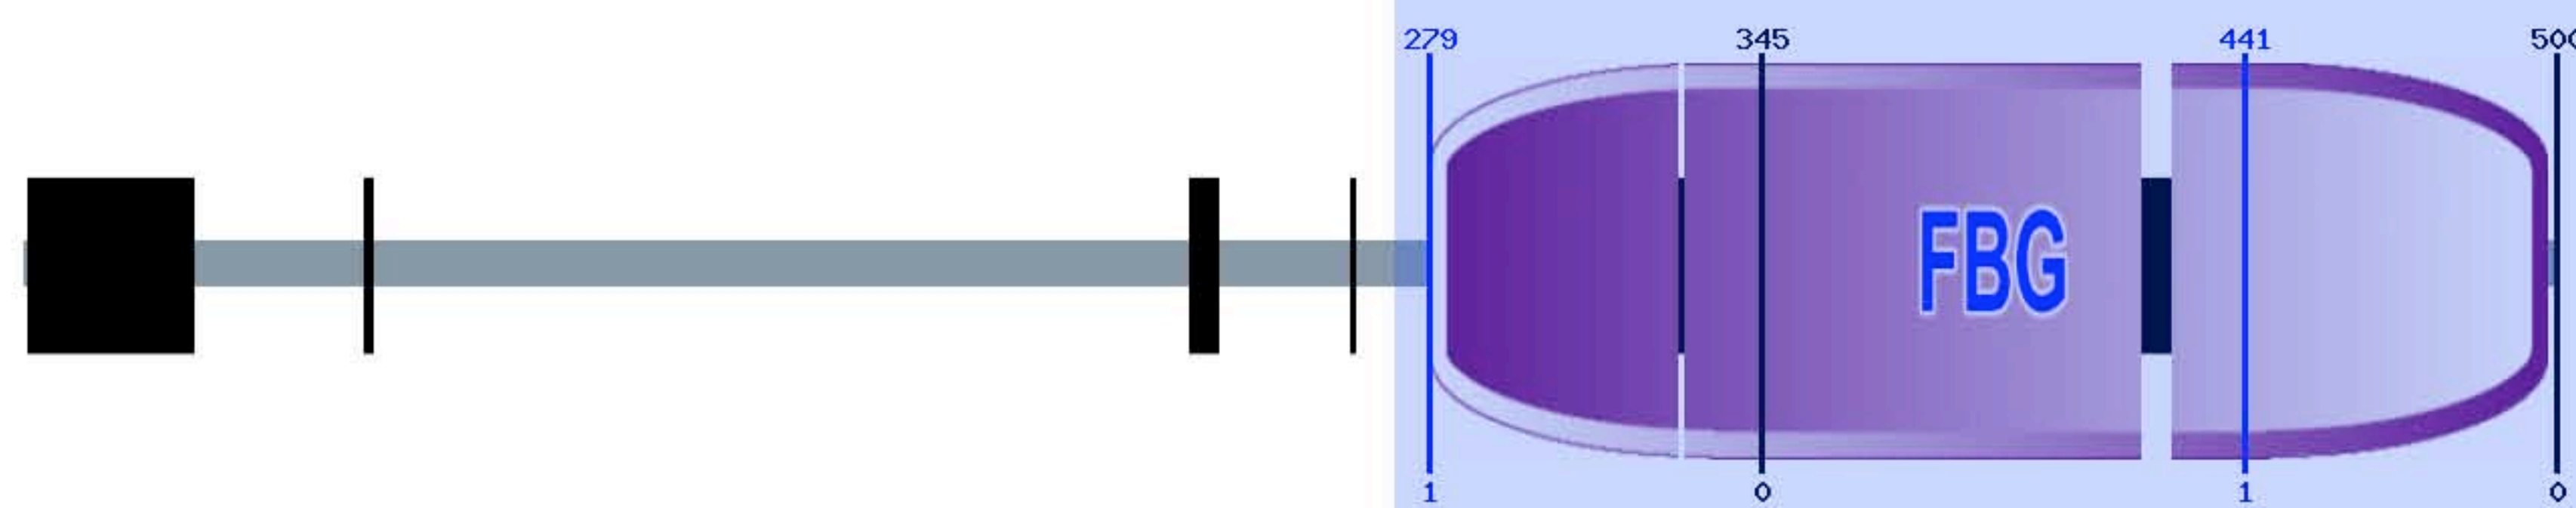

**SINFRUP00000129054**



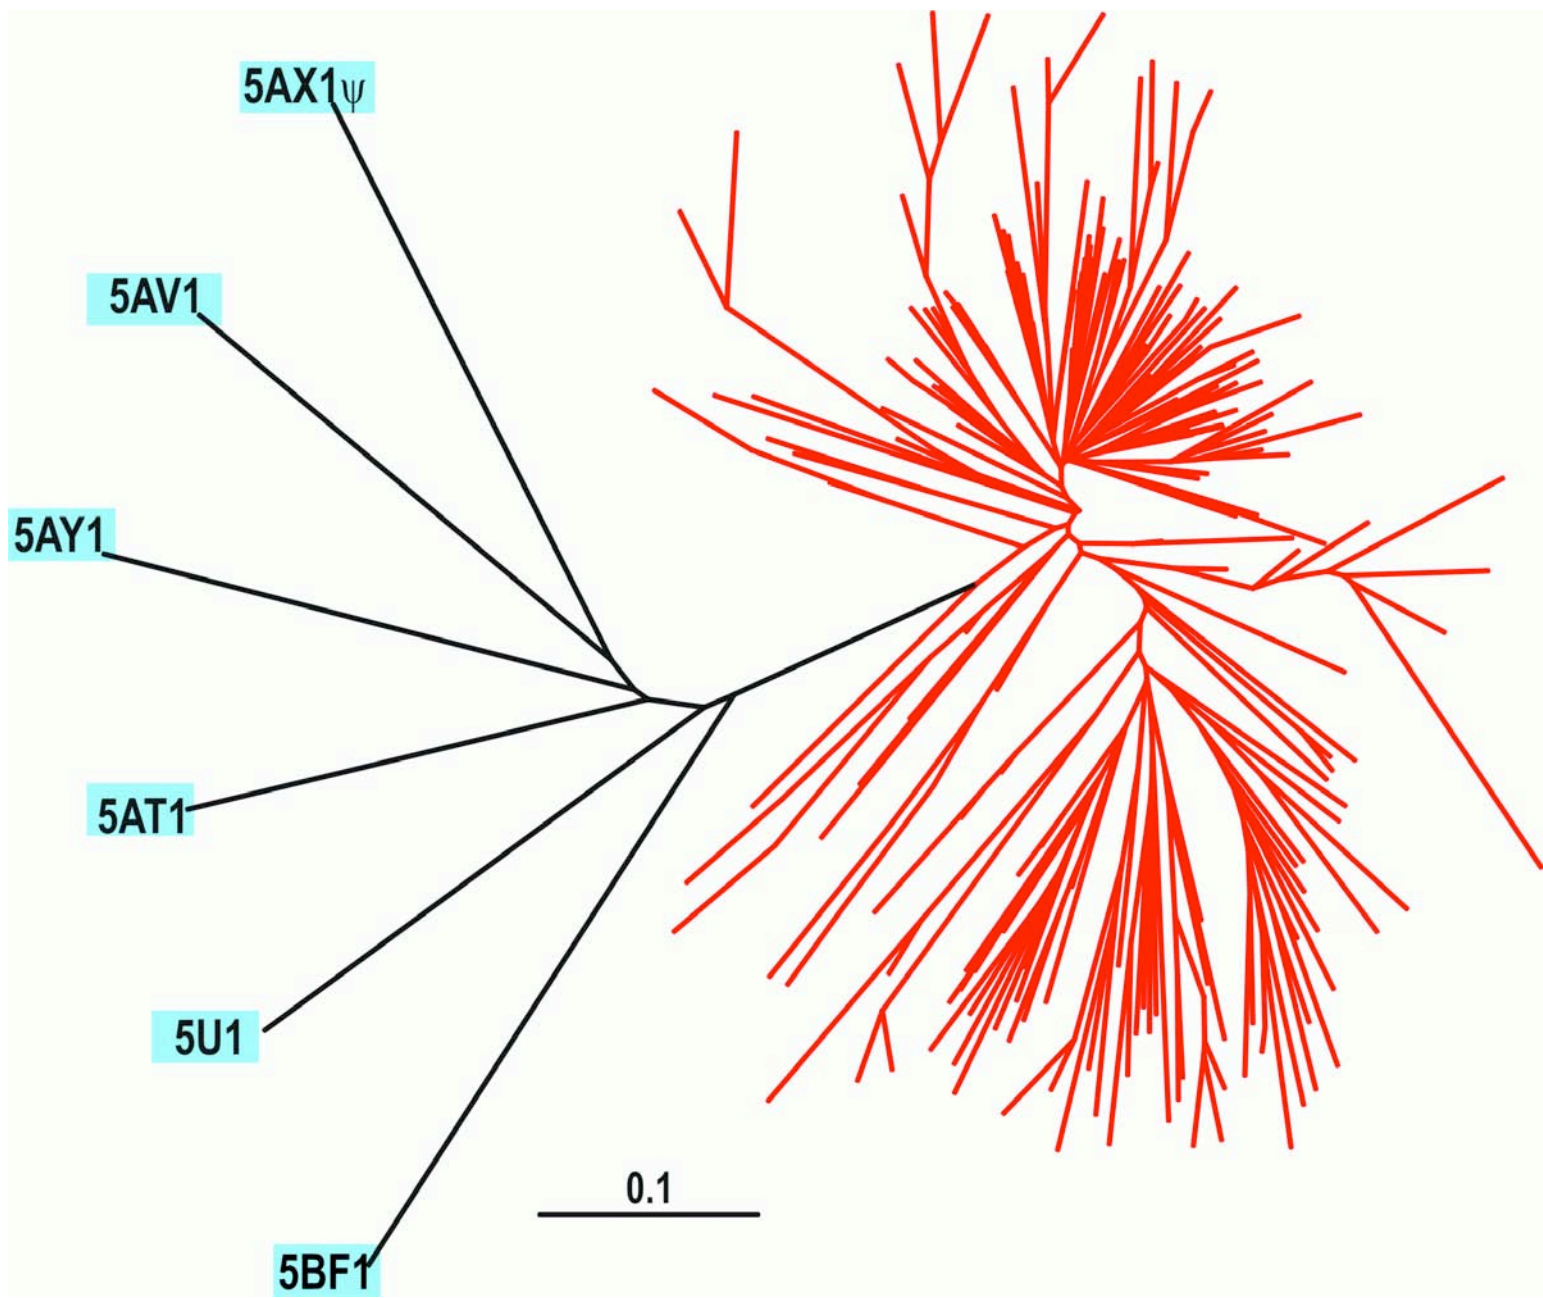

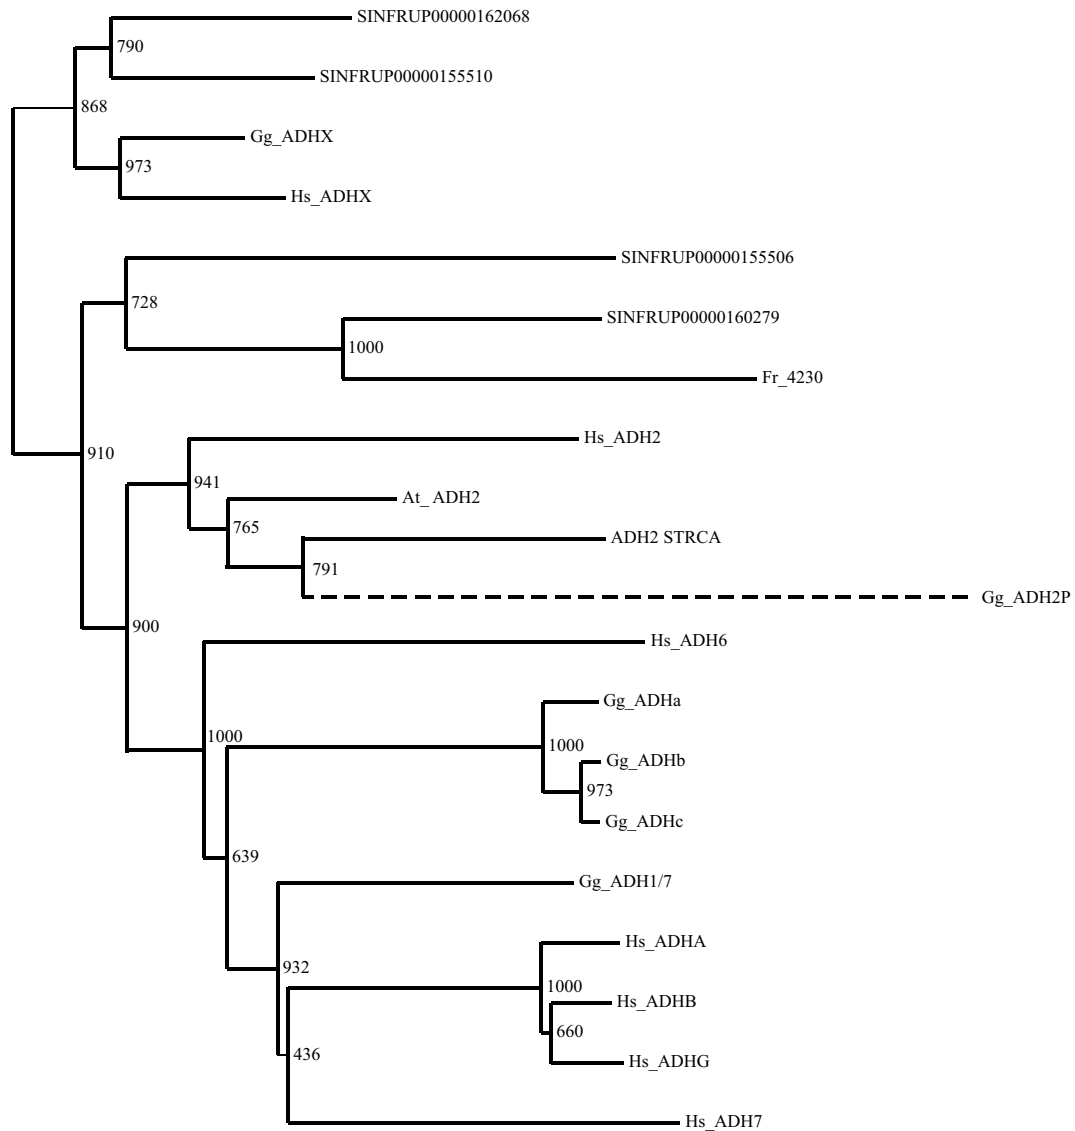

0.1

# A:

Human MTRILTAFKVVRITLKTGFGEINVTAHQKTKSRPGIRLLSVKAQTAHTVLEDGTKMKQYS  
Chick MTRILTACKMKITLGRLEICKVSA-DHSEWRSCTRLLSIIKAQTANVLEDGTKMKQYS

Human FGHPSVAGEVVFNTGLGSPEAITDPAIKGQILTMANPTIIGNGAPDITALDELGLSKY  
Chick FGYPSSTAGEVVFNTGISSEYTEAITDPSIKGQILTLANPVVGNCGVPDIAALDEIGRRF

Human LESNGIKVSGLLVLDYSKDNHWLATKSLGQMLQEEKVPAIYGVDRMTKIIIRDKGMML  
Chick LESDGIKVSGLLVLDYSNEISHWQAARSLGEWLQEEKVPAIYGVDRMTSKLIIRDKGTVL

Human GKIEFEGQPVDFVDPNKQNLIAEVSTKDVKVGKGNPTKVVAVDCGKIKNVIRLLVKRGA  
Chick GKIEFEGQPTFADPNKQNLIAEVSTKELRTAEGDYCFRMLMDCEVSLNIVLDTEGQGA

Human EVHLVPAWHDFTKMEYDGLIAGGPGNPALAEPLIQNVRKILESDRKEPLFCISTGNLIT  
Chick EVHLVPAWHDFTSMEYDGLISGGPGDEMKAEVLIQNVKVLLESNRKEPLFCIGMGNLIT

Human GLAAGAKTKKSMANRQNOQPVLNITNKQAFITAQNHGVALDN-TLPAEWKPLFVNVNDQ  
Chick GLAAGATSRQMANRQNOQPVNLTLSGQAVITAQNHAVALDSSTLPPWRPLFVNVNDQ

Human TNEGIMHESKPEFAVQPHPEVTPGPIDIEYLFDSFSLIKKQKATTITSVLPKPAIVASR  
Chick TNEGIMHETREIFETAQFYEDANPGPTDIEELFDSFISLVKRSKGTITIASVLPKAGATA SR

Human VEVSKVLILGSGCLSTICQAGEFDYSGSQAVKAMKEENVKTVLMNPNIASVQITNEVGLKQA  
Chick VEVSKVLILGSGCLSTICQAGEFDYSGSQAVKALKEENVKI VLMNPNIASVQITNETGLKQA

Human DTVYFLPITPQFVTEVIKAEQPDGLILEMGGQTALNCGVELFKRGVLKEYGVKVLGTSVE  
Chick DAVYFLPITPQFVTEVIKAEHPDGLILEMGGQTALNCGVELFKQGVLOQGVKVLGTSVE

Human SIMATEDRQLFSDKLNELNEKIAPSPFAVESIEDALKAA DTNGYPPVMIRSAVALGGLGSGT  
Chick SIMATEDRKLFSDKLMELNEKIAPSPFAVESIEDALEAAEKISYPPVMIRSAVALGGLGSGV

Human CPNRETLMDLSTKAFAMINQILVEKSVTEWKEIEYEVVRDADDNCVTVCNMENVDAMGVH  
Chick CTDKESLDLIGTKAFAVIKQILVEKSVVSWKEIEYEVVRDADDNCIACVNMENIDAMGVH

Human TGDVVVA PAQTLNAEFQMLRRTSINVVRLHGVIVGECNIQFALHPTSMEXCIIEVNARL  
Chick TGDVVVA PSQLTNEEFQMLRDRAIKVRYLDIVGECNIQFALHPTSLIYYTIEVNARL

Human SRSSALASKATCYPLAFIAAKIALGIPLEIKNVVSGKTSACEPESLD MVTKIPRNDLD  
Chick SRSSALASKATCYPLAFIAAKIALGIPLEIKNVVTGKTSAYFEPESLDVVTKIPRNDLD

Human RFHGTS SRIGSSMKSVGEVMAIGRTFEESEFQKALRMCHPSIEGFTPRLPNKKEWPSNLDL  
Chick RFQGTSNQIGSSMKSVGEVMAIGRTFEESEFQKALRMCHPSIDGFTSHLPNKKA WPAIADL

Human RKELSEPSSIRIYAIKAIADDNMSLDEIEKLYIDKWFLYKMRDILNMEKTLKGLNSESM  
Chick QKELSEPSSIRIYAMAKALENGVPVDVIEHKLTAIDKWFLCKMRSIVNMEKILKEVKHEEI

Human TEETLKRKEIGFSDKQISKCLGLTEAQTRELRKKNIH PWVKQIDTLAAEVPSVTNYLY  
Chick PEETIRKAKQMGFSDRQIGKCLGLTEVQCRQIRLRKNVVPWVKKIDTLAAEYPAVTNYLY

Human VTYNGQEHVNFDDHGMVVLGCGPYHIGSSVEFDWCAVSSIRTLRLQEGKKVVVVNCNPEI  
Chick VTYNGQEHDIKFDDCGVVVLGCGPYHIGSSVEFDWCAVSSIRTLRLQENKIVVVVNCNPEI

Human VSTDFDECDKLYFEELSLERILDIYHQEAGGSCIIISVGGQIPNNLAVPIYKNGVKIMCIS  
Chick VSTDFDECDRLYFEEMSLERILDIYQYEGGSCIIISVGGQIPNNLAVPIHQSGVKIFGTH

Human PLQIDRAEDRSIFSAVLDEIKVAQAPWKAVENTLNEALEYAKSVDYPCILRPSYVLSGSAM  
Chick PLQINRAEDRSIFSAVLDEIHLVAQAPWKAVENTLVDAVEFAGSVSYPCILRPSYVLSGSAM

Human NVVFSSEDEKKFLEEATRVSQEHPPVLTKEVEGAREVEMDAVGKDRVISHAISEHVEDA  
Chick NVVFTSEELKKFLVEATRVSQDHPVLTKEVEDAREVEMDAVAKAGRVIHAHAVSEHVEDA

Human GVHSGDATIMLPTQTISQGAIEKVKDAIRKIAKAFATISGPFNVQFLVKENDVLVIECNLR  
Chick GVHSGDATIMLPTQTISQGAIEKVKSAIKKIANAFATISGPFNVQFLVRENVLVIECNLR

Human ASRSFPFVSKTLGVDFLDVATKVMIGENVDEKHLPTLDHPITPADYVAIKAPMFSWPRVR  
Chick ASRSFPFVSKTLGVDFLDVATKVMIGKENESSLPTLEHPILPSKYIGIKAPVFSWSRVR

Human DADPILRCEMASTGEVACFGEGIHTAF LKAMLS TGFKLPQKGLILIGIQQSFRPRFLGVAE  
Chick DADPVLRCMASTGEVACFGEDEVYSAFQKAMLATGFTFPKQGLILIGIQQSFRPKFLGVAE

Human QLHNEGKLFATEATS DNLNANNVPATPVAWPSQEGQNPSSIRKLRDGSIDLVINLP  
Chick LLYGKGFKLYATEATS DNLNANGIPADPVAWPSQESLSPSLPPVRRLRDGGIDLVINLP

Human NNNTKFDHNVIRRTAVDSGIPLLTNFQVTKLFAEAVQKSRKVDKSLFHVROYSAGKAA  
Chick NSNTKFDHNVIRRMADSGIALLLTNFQVTKLFAEAIKYSGLKLDKSLFHVROFDKGDAA



**B:**

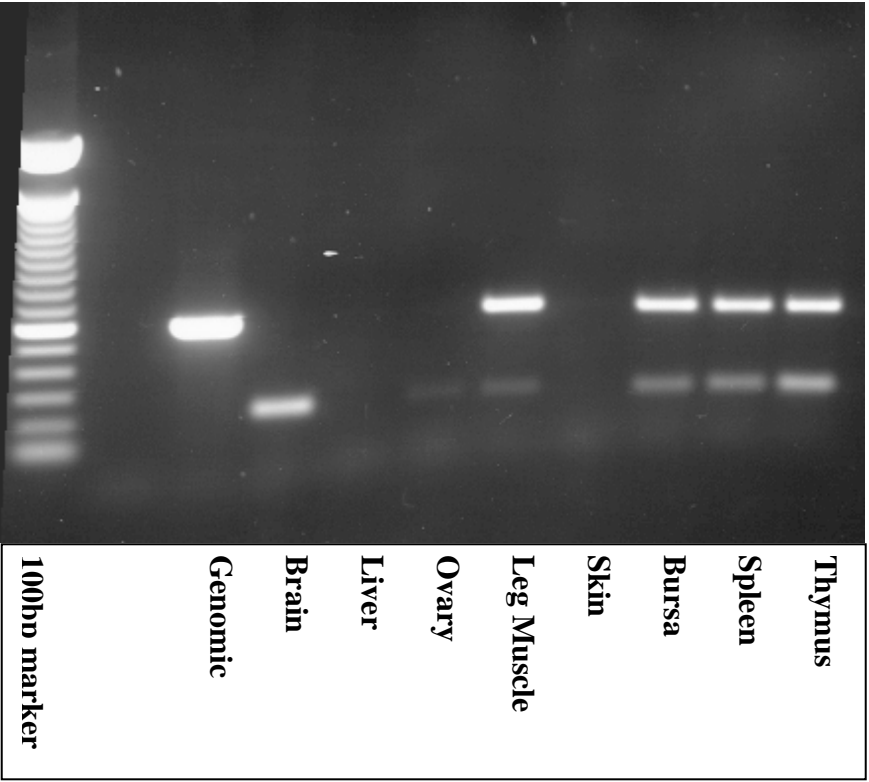

**Chromosome length (Mb)**

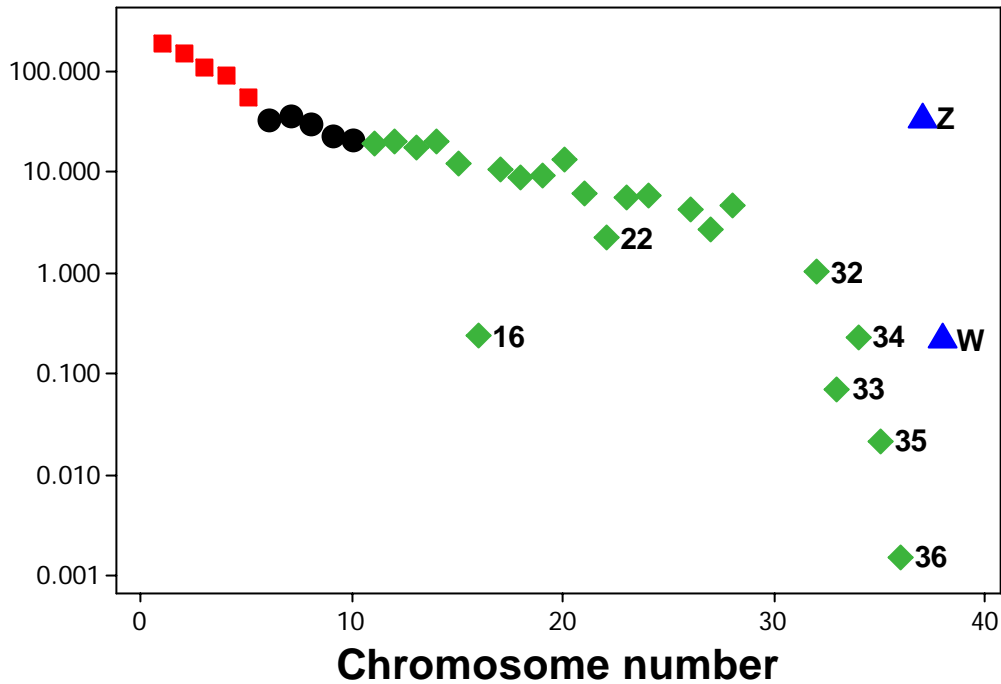



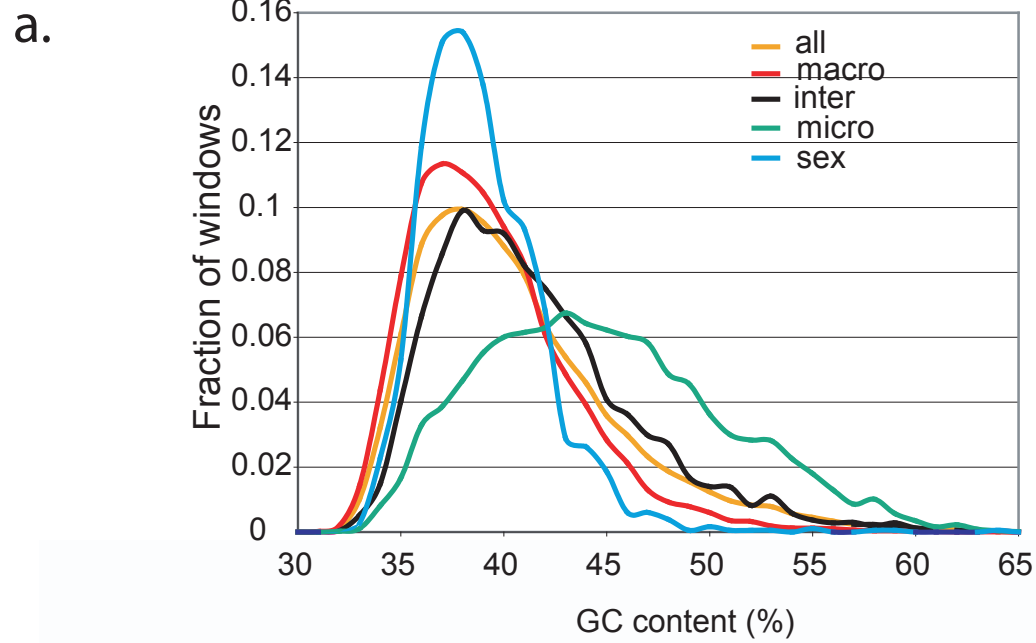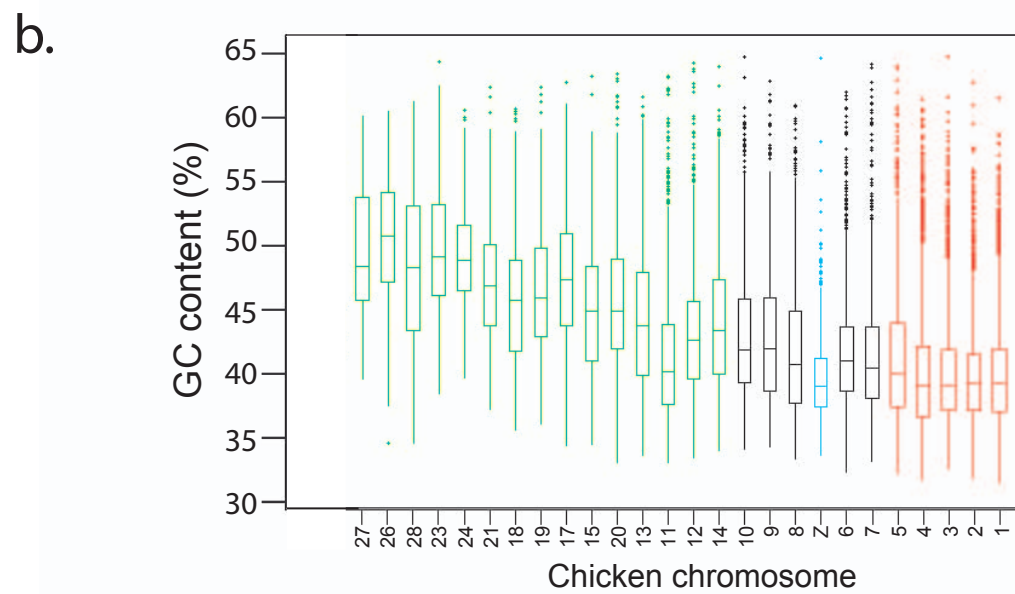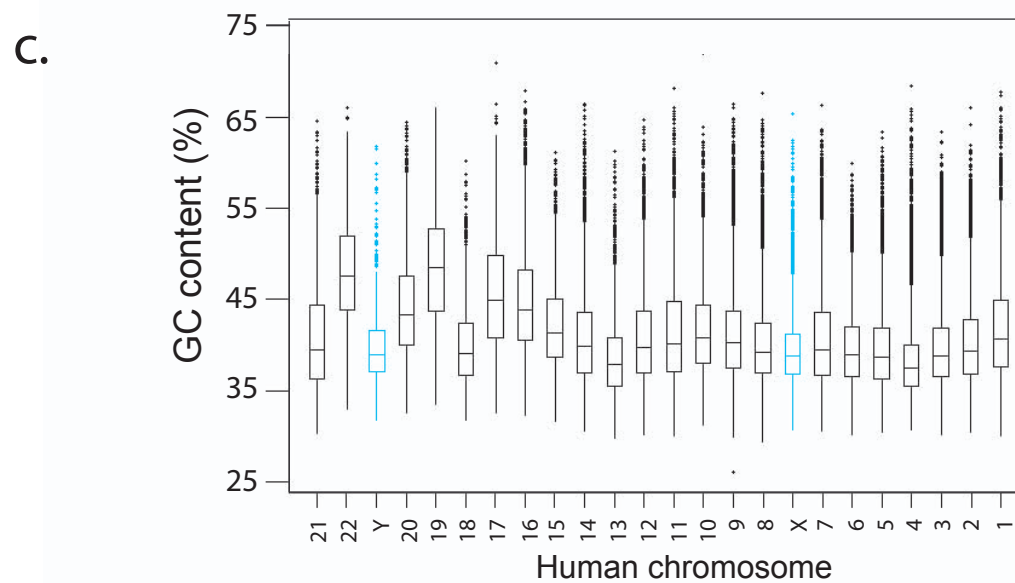

**Fraction of 2 Mbp window comprised by interspersed repeats**

0.35  
0.30  
0.25  
0.20  
0.15  
0.10  
0.05  
0.00

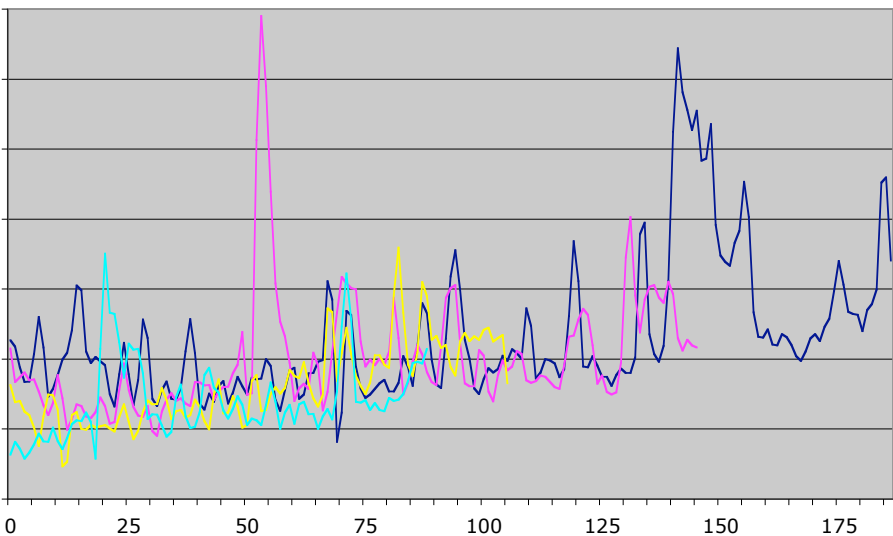

**Position along chromosome (Mbp)**

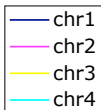

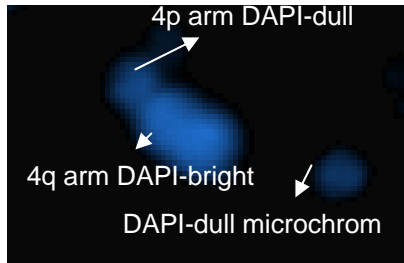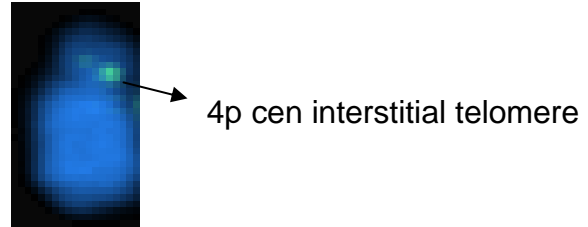



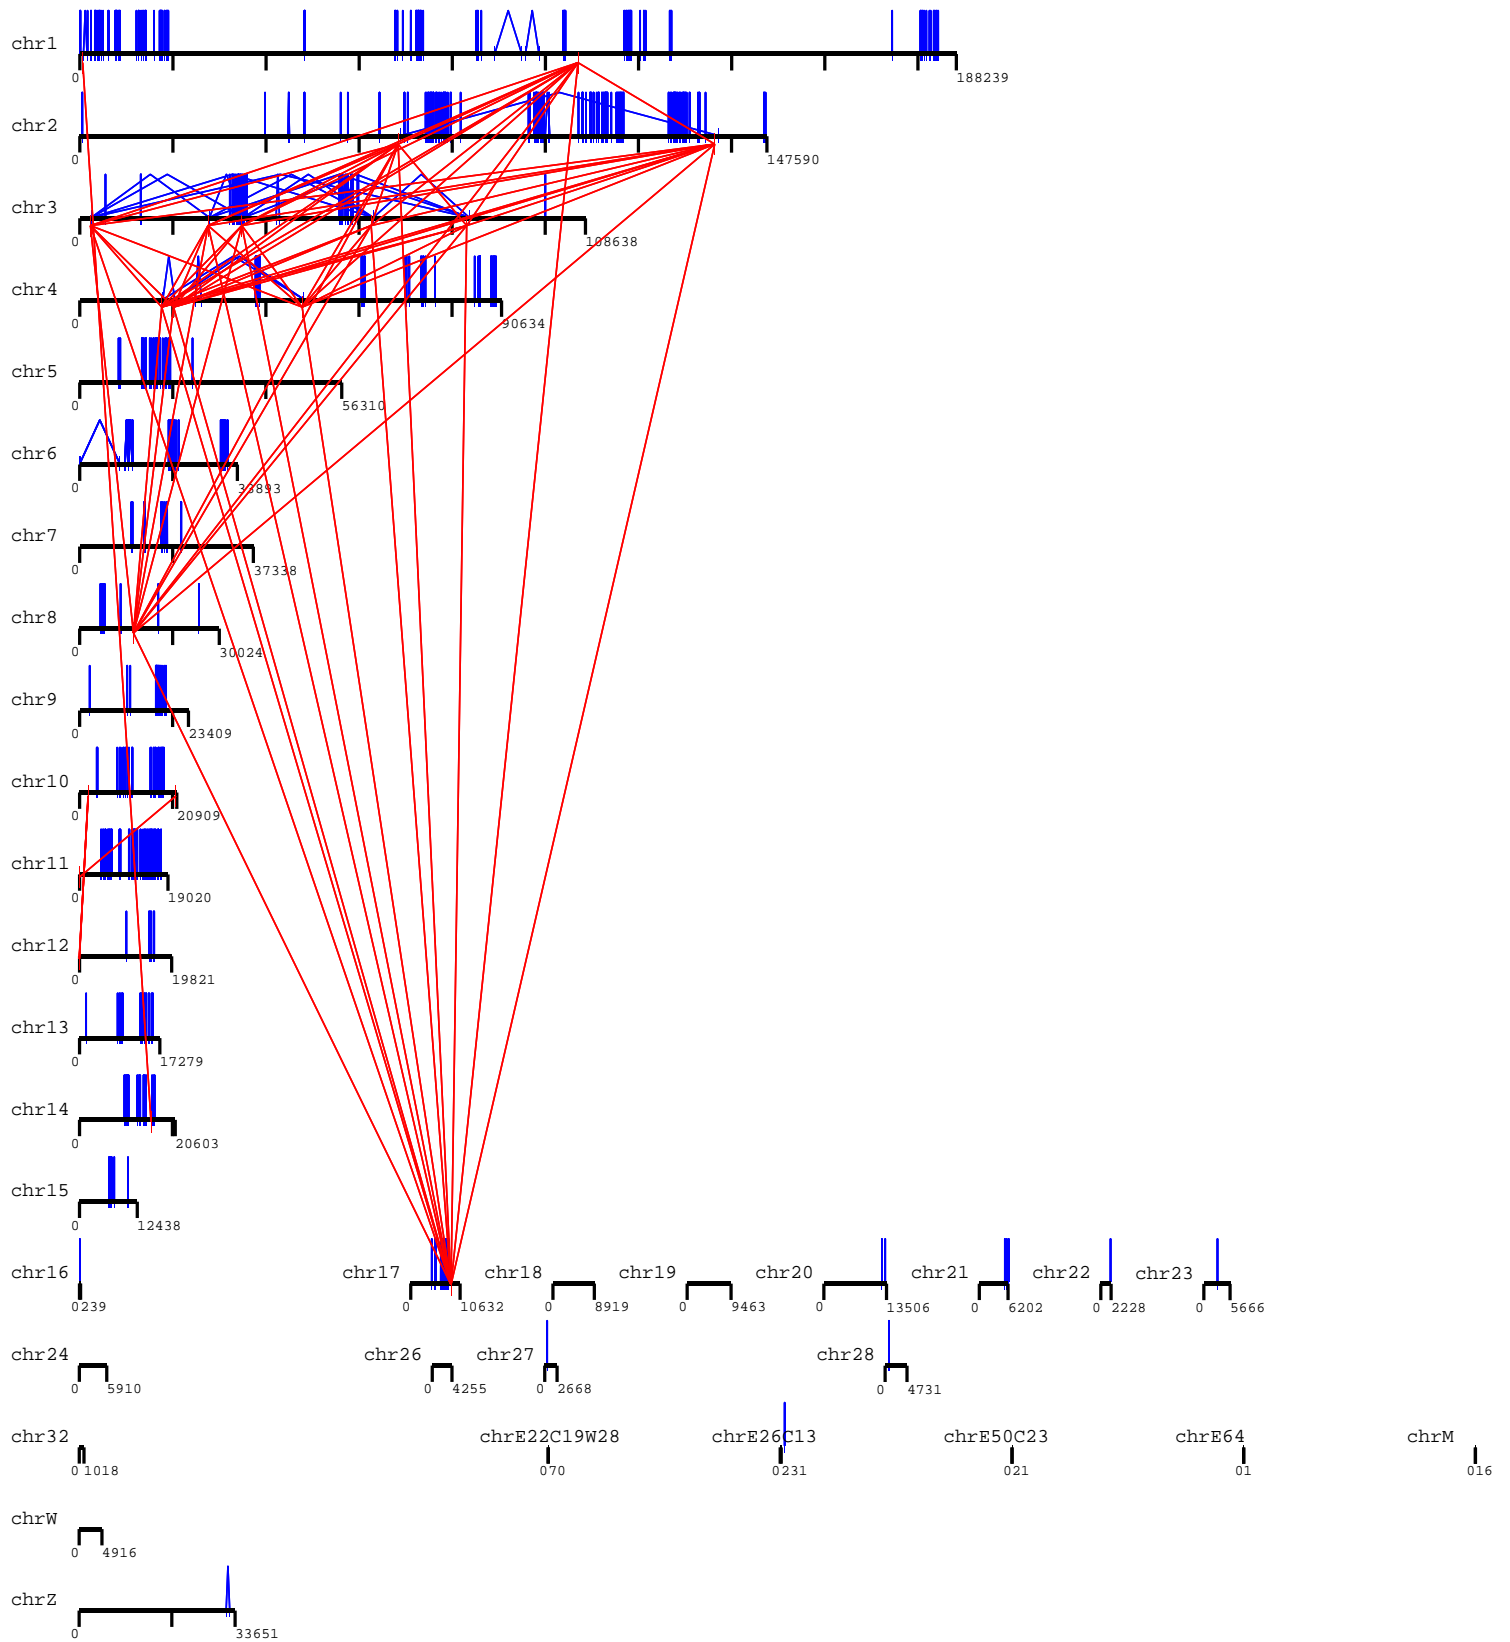

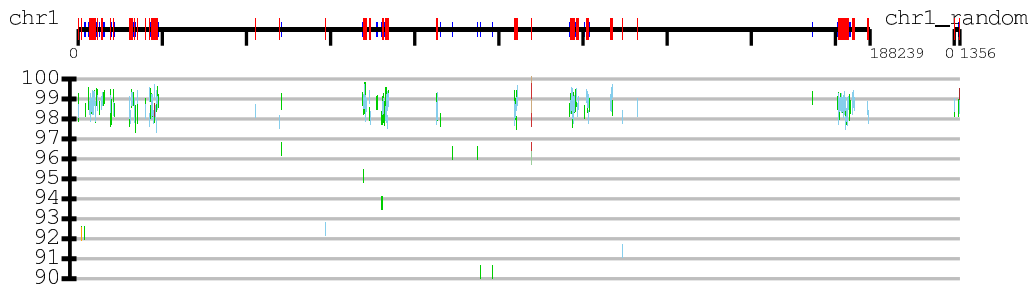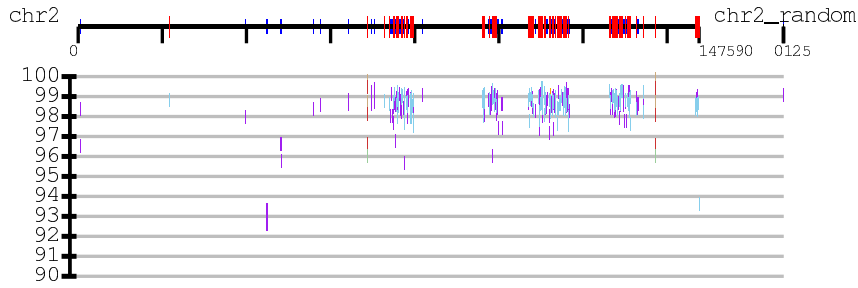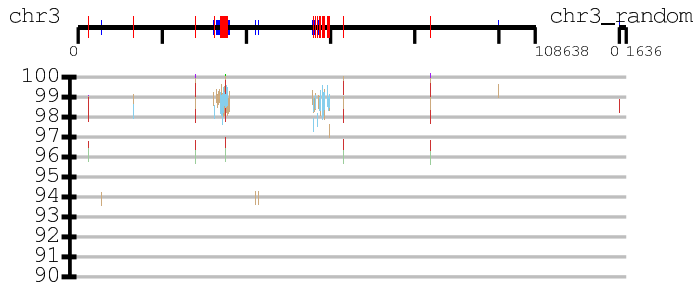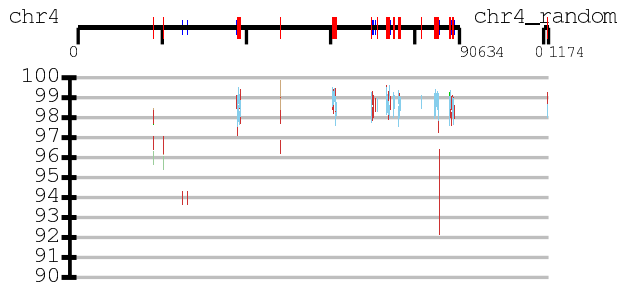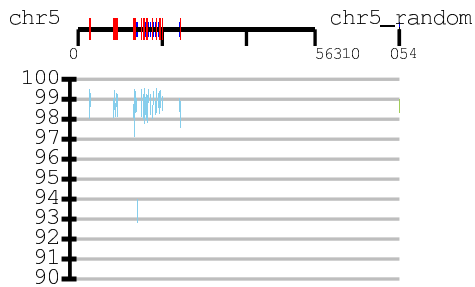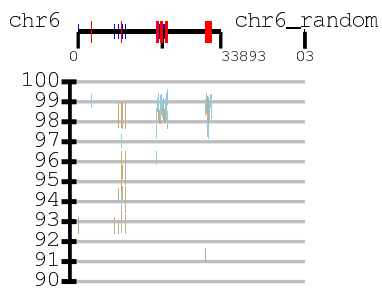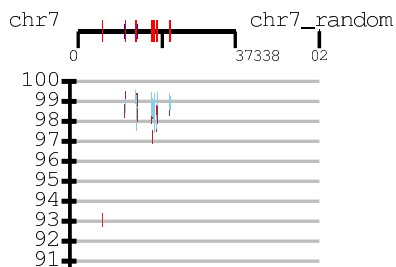



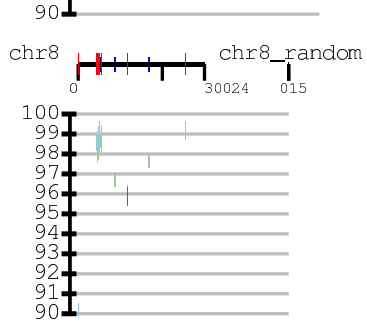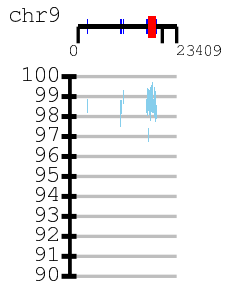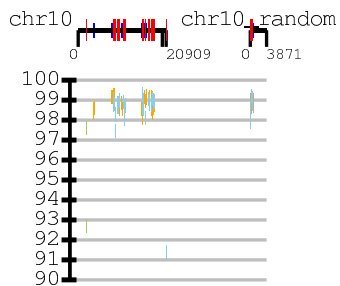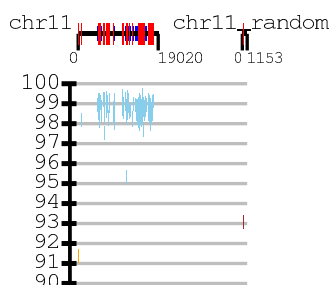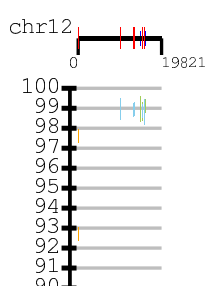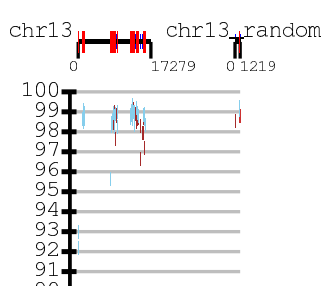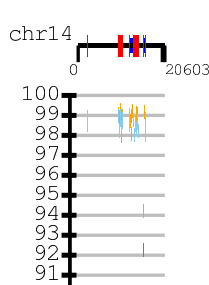

chr15  
0 12438

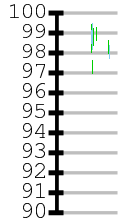

chr16 chr16\_random chr17 chr18 chr19 chr20 chr21 chr22 chr23  
0 239 0 1085 0 10632 0 8919 0 9463 0 13506 0 6202 0 2228 0 5666

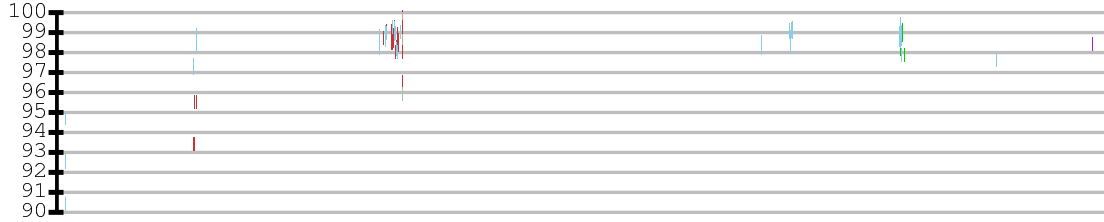

chr24 chr24\_random chr26 chr27 chr27\_random chr28 chr28\_random  
0 5910 0 149 0 4255 0 2668 0 721 0 4731 0 6

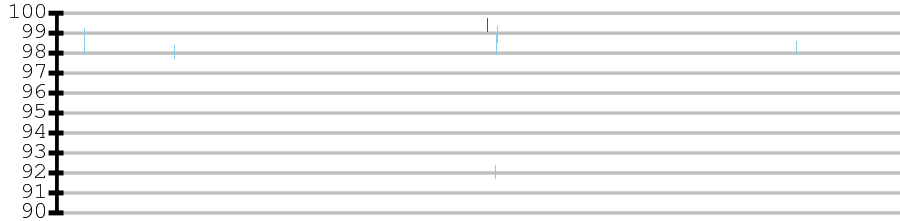

chr32 chr32\_random chrE22C19W28 chrE26C13 chrE50C23 chrE64 chrM  
0 1018 0 61 0 70 0 231 0 21 0 1 0 16

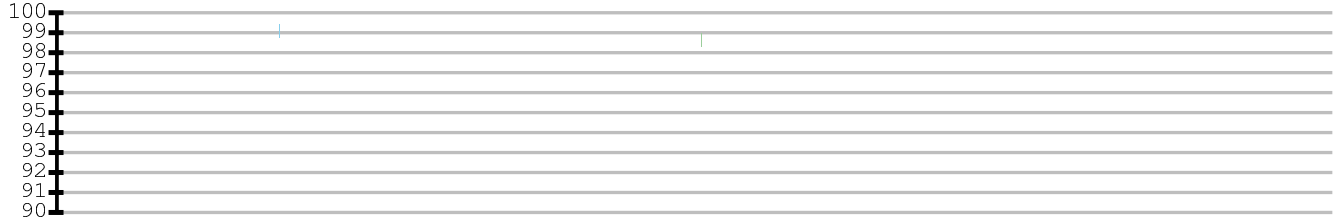

chrUn  
0 165033

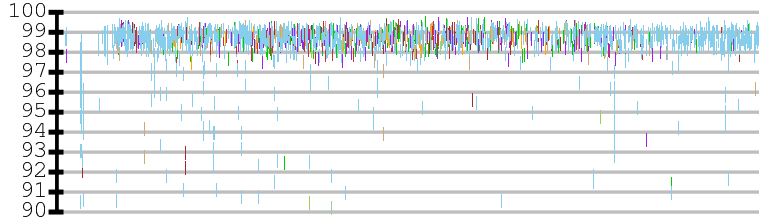

chrW chrW\_random  
0 4916 0 455

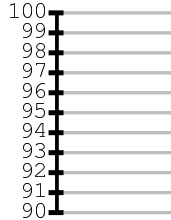

chrZ  
0 33651

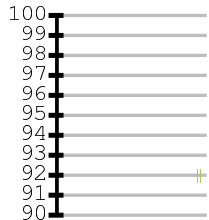





| first line: shared orthologs (random expectation); second: number of synteny blocks (random expectation); color marks over-/under- representation of orthologs (p-value<1%) |                    |                    |                    |                    |                     |                    |                   |                    |                  |                    |                    |                    |                    |                    |                    |                  |                    |                    |                    |                    |                    |                 |                    |                |         |
|-----------------------------------------------------------------------------------------------------------------------------------------------------------------------------|--------------------|--------------------|--------------------|--------------------|---------------------|--------------------|-------------------|--------------------|------------------|--------------------|--------------------|--------------------|--------------------|--------------------|--------------------|------------------|--------------------|--------------------|--------------------|--------------------|--------------------|-----------------|--------------------|----------------|---------|
| Human                                                                                                                                                                       | 4 (849)            | 6 (1113)           | 10 (839)           | 14 (709)           | 1 (2165)            | 2 (1455)           | 15 (679)          | 20 (636)           | 12 (1088)        | 5 (1008)           | 9 (844)            | 3 (1138)           | 8 (788)            | 16 (946)           | 17 (1222)          | 19 (1377)        | 11 (1415)          | 13 (377)           | X (869)            | 7 (1063)           | 22 (528)           | 18 (306)        | 21 (261)           | DR51 (2)       | Y (110) |
| 4 (1178)                                                                                                                                                                    | 461 (31)<br>36 (2) |                    |                    |                    |                     | 29 (49)<br>4 (4)   |                   | 11 (20)<br>2 (2)   |                  |                    |                    |                    | 38 (25)<br>7 (1)   |                    |                    |                  |                    |                    | 174 (19)<br>32 (2) |                    |                    |                 |                    |                |         |
| 3 (1267)                                                                                                                                                                    |                    | 414 (39)<br>15 (2) |                    |                    | 126 (73)<br>8 (7)   | 225 (53)<br>22 (4) |                   | 27 (21)<br>5 (2)   |                  |                    |                    |                    | 43 (27)<br>5 (2)   |                    |                    |                  | 24 (35)<br>1 (3)   |                    |                    |                    |                    |                 |                    |                |         |
| 6 (549)                                                                                                                                                                     |                    |                    | 349 (14)<br>38 (1) |                    |                     |                    |                   |                    |                  |                    |                    |                    |                    |                    |                    |                  |                    |                    |                    |                    |                    |                 |                    |                |         |
| 5 (931)                                                                                                                                                                     |                    |                    |                    | 334 (18)<br>11 (0) |                     |                    | 63 (18)<br>6 (2)  |                    | 2 (28)<br>1 (1)  |                    |                    |                    |                    |                    |                    |                  | 223 (26)<br>24 (2) |                    |                    |                    |                    |                 |                    |                |         |
| 8 (561)                                                                                                                                                                     |                    |                    |                    | 4 (10)<br>1 (0)    | 376 (32)<br>16 (3)  |                    |                   |                    |                  |                    |                    |                    |                    |                    |                    |                  |                    |                    |                    |                    |                    |                 |                    |                |         |
| 7 (561)                                                                                                                                                                     |                    |                    |                    |                    |                     | 321 (23)<br>19 (2) |                   | 2 (16)<br>1 (1)    |                  |                    | 25 (22)<br>4 (2)   |                    |                    |                    |                    |                  |                    |                    |                    |                    |                    |                 | 13 (3)<br>2 (0)    |                |         |
| 10 (421)                                                                                                                                                                    |                    |                    |                    |                    |                     | 2 (17)<br>1 (1)    | 273 (8)<br>31 (1) |                    |                  |                    |                    |                    |                    |                    |                    |                  |                    |                    |                    |                    |                    |                 |                    |                |         |
| 20 (361)                                                                                                                                                                    |                    |                    |                    |                    |                     |                    | 2 (7)<br>1 (0)    | 226 (6)<br>20 (0)  |                  |                    |                    |                    |                    |                    |                    |                  |                    |                    |                    |                    |                    |                 |                    |                |         |
| 1 (2080)                                                                                                                                                                    |                    | 16 (54)<br>3 (6)   |                    | 46 (120)<br>9 (12) | 45 (87)<br>1 (7)    | 7 (41)<br>3 (5)    |                   | 344 (62)<br>21 (4) |                  |                    | 104 (83)<br>11 (9) |                    |                    |                    |                    |                  | 102 (58)<br>9 (6)  | 231 (27)<br>10 (1) | 114 (33)<br>5 (4)  | 149 (56)<br>14 (5) | 146 (28)<br>6 (2)  |                 | 105 (14)<br>4 (0)  |                |         |
| 13 (352)                                                                                                                                                                    |                    |                    |                    |                    |                     |                    |                   |                    |                  | 221 (10)<br>24 (1) |                    |                    |                    |                    |                    |                  |                    |                    |                    |                    |                    |                 |                    |                |         |
| 17 (313)                                                                                                                                                                    |                    |                    |                    |                    |                     |                    |                   |                    |                  |                    | 199 (7)<br>16 (0)  |                    |                    |                    |                    |                  |                    |                    |                    |                    |                    |                 |                    |                |         |
| 9 (463)                                                                                                                                                                     |                    |                    |                    |                    |                     | 89 (19)<br>11 (1)  |                   |                    |                  |                    |                    | 220 (18)<br>22 (2) |                    |                    |                    |                  |                    |                    |                    |                    |                    |                 |                    | 6 (3)<br>2 (0) |         |
| 2 (1432)                                                                                                                                                                    | 79 (45)<br>7 (2)   | 75 (37)<br>2 (4)   |                    | 9 (83)<br>1 (8)    |                     |                    |                   |                    |                  | 46 (42)<br>7 (5)   | 16 (32)<br>4 (3)   | 146 (57)<br>15 (6) | 230 (30)<br>11 (2) |                    |                    |                  |                    |                    |                    |                    | 204 (38)<br>15 (3) |                 | 120 (12)<br>12 (1) |                |         |
| 11 (304)                                                                                                                                                                    |                    |                    |                    |                    |                     |                    |                   |                    |                  |                    |                    |                    |                    | 173 (6)<br>25 (1)  |                    |                  | 27 (2)<br>1 (0)    |                    |                    |                    |                    |                 |                    |                |         |
| 19 (332)                                                                                                                                                                    |                    |                    |                    |                    |                     |                    |                   |                    |                  |                    |                    |                    |                    |                    | 179 (10)<br>21 (1) |                  |                    |                    |                    |                    | 48 (9)<br>8 (0)    |                 |                    |                |         |
| 28 (181)                                                                                                                                                                    |                    |                    |                    |                    |                     |                    |                   |                    |                  |                    |                    |                    |                    |                    |                    |                  | 111 (1)<br>21 (0)  |                    |                    |                    |                    |                 |                    |                |         |
| 12 (369)                                                                                                                                                                    |                    |                    |                    |                    |                     |                    |                   |                    |                  |                    | 17 (8)<br>2 (1)    | 213 (14)<br>29 (1) |                    |                    |                    |                  |                    |                    |                    |                    |                    |                 |                    |                |         |
| 14 (518)                                                                                                                                                                    | 3 (16)<br>1 (0)    | 9 (13)<br>2 (1)    |                    | 4 (30)<br>1 (3)    | 6 (21)<br>3 (1)     |                    | 34 (8)<br>4 (0)   |                    |                  |                    |                    |                    |                    | 163 (11)<br>25 (1) | 30 (15)<br>3 (2)   |                  |                    |                    |                    |                    | 77 (14)<br>8 (1)   |                 | 11 (4)<br>1 (0)    |                |         |
| 15 (374)                                                                                                                                                                    |                    |                    |                    |                    |                     |                    |                   | 156 (11)<br>7 (0)  |                  |                    |                    |                    |                    |                    |                    |                  |                    |                    |                    |                    |                    |                 | 96 (5)<br>13 (0)   |                |         |
| 18 (217)                                                                                                                                                                    |                    |                    |                    |                    |                     |                    |                   |                    |                  |                    |                    |                    |                    |                    | 146 (6)<br>17 (0)  |                  |                    |                    |                    |                    |                    |                 |                    |                |         |
| 21 (231)                                                                                                                                                                    |                    |                    |                    |                    | 148 (13)<br>12 (1)  |                    |                   |                    |                  |                    |                    |                    |                    |                    |                    |                  |                    |                    |                    |                    |                    |                 |                    |                |         |
| Z (369)                                                                                                                                                                     | 7 (9)<br>3 (0)     |                    |                    |                    |                     |                    |                   |                    |                  |                    | 128 (10)<br>12 (1) | 83 (8)<br>12 (1)   |                    | 7 (7)<br>2 (0)     |                    |                  |                    |                    |                    |                    |                    |                 |                    | 2 (3)<br>1 (0) |         |
| 24 (185)                                                                                                                                                                    |                    |                    |                    |                    |                     |                    |                   |                    |                  |                    |                    |                    |                    |                    |                    |                  |                    | 120 (5)<br>10 (0)  |                    |                    |                    |                 |                    |                |         |
| 23 (212)                                                                                                                                                                    |                    |                    |                    |                    | 128 (12)<br>20 (1)  |                    |                   |                    |                  |                    |                    |                    |                    |                    |                    |                  |                    |                    |                    |                    |                    |                 |                    |                |         |
| 26 (185)                                                                                                                                                                    |                    | 43 (5)<br>5 (0)    |                    |                    | 84 (10)<br>6 (1)    |                    |                   |                    |                  |                    |                    |                    |                    |                    |                    |                  |                    |                    |                    |                    |                    |                 |                    |                |         |
| 27 (116)                                                                                                                                                                    |                    |                    |                    |                    | 2 (2)<br>1 (0)      |                    |                   |                    |                  |                    |                    |                    |                    |                    |                    |                  | 60 (3)<br>13 (0)   |                    |                    |                    |                    |                 |                    |                |         |
| W (45)                                                                                                                                                                      |                    |                    |                    |                    |                     |                    |                   |                    |                  |                    | 28 (1)<br>2 (0)    |                    |                    |                    |                    |                  |                    |                    |                    |                    |                    |                 |                    |                |         |
| 32 (60)                                                                                                                                                                     |                    | 9 (1)<br>2 (0)     |                    |                    | 30 (3)<br>6 (0)     |                    |                   |                    |                  |                    |                    |                    |                    |                    |                    |                  |                    |                    |                    |                    |                    |                 |                    |                |         |
| 22 (49)                                                                                                                                                                     |                    |                    |                    |                    |                     | 8 (2)<br>1 (0)     |                   | 6 (0)<br>1 (0)     |                  |                    |                    |                    | 18 (1)<br>1 (0)    |                    |                    |                  |                    |                    |                    |                    |                    |                 |                    |                |         |
| E26C13 (14)                                                                                                                                                                 |                    |                    |                    |                    | 12 (0)<br>3 (0)     |                    |                   |                    |                  |                    |                    |                    |                    |                    |                    |                  |                    |                    |                    |                    |                    |                 |                    |                |         |
| 16 (22)                                                                                                                                                                     |                    | 3 (0)<br>1 (0)     |                    |                    |                     |                    |                   |                    |                  |                    |                    |                    |                    |                    |                    |                  |                    |                    |                    |                    |                    |                 |                    |                |         |
| E22C19W28 (5)                                                                                                                                                               |                    |                    |                    |                    |                     |                    |                   |                    |                  |                    |                    |                    |                    |                    |                    |                  |                    |                    |                    |                    |                    |                 |                    |                |         |
| Un (2870)                                                                                                                                                                   | 2 (76)<br>1 (6)    | 6 (90)<br>1 (5)    | 18 (75)<br>8 (8)   | 5 (55)<br>2 (2)    | 64 (166)<br>20 (16) | 16 (120)<br>5 (10) | 7 (57)<br>3 (7)   | 2 (49)<br>1 (5)    | 29 (86)<br>8 (6) | 19 (84)<br>6 (10)  | 12 (65)<br>3 (7)   | 7 (115)<br>3 (13)  | 47 (62)<br>4 (4)   | 26 (63)<br>8 (10)  | 24 (88)<br>9 (11)  | 18 (25)<br>8 (4) | 15 (80)<br>6 (8)   |                    |                    |                    | 4 (78)<br>2 (7)    | 2 (39)<br>1 (3) | 23 (25)<br>5 (3)   |                |         |
| E50C23 (2)                                                                                                                                                                  |                    |                    |                    |                    |                     |                    |                   |                    |                  |                    |                    |                    |                    |                    |                    |                  |                    |                    |                    |                    |                    |                 |                    |                |         |

Number of inter-chromosomal relations: 84 (16 on diagonal)

first line: shared orthologs (random expectation); second: number of synteny blocks (random expectation); color marks over-/under- representation of orthologs (p-value<1%)

| Human     | 1 (2165)           | 14 (709)          | X (869)            | 20 (636)           | 17 (1222)          | 19 (1377)          | 2 (1455)          | 6 (1113)          | 16 (946)           | 4 (849)            | 5 (1008)          | 11 (1415)          | 3 (1138)           | 12 (1088)         | 18 (306)           | 8 (788)           | 13 (377)           | 7 (1063)         | 10 (839)          | 9 (844)          | 22 (528)           | 15 (679)           | 21 (261)          | Y (110)         | DR51 (2) |  |
|-----------|--------------------|-------------------|--------------------|--------------------|--------------------|--------------------|-------------------|-------------------|--------------------|--------------------|-------------------|--------------------|--------------------|-------------------|--------------------|-------------------|--------------------|------------------|-------------------|------------------|--------------------|--------------------|-------------------|-----------------|----------|--|
| Mouse     |                    |                   |                    |                    |                    |                    |                   |                   |                    |                    |                   |                    |                    |                   |                    |                   |                    |                  |                   |                  |                    |                    |                   |                 |          |  |
| 4 (1499)  | 596 (93)<br>16 (3) |                   |                    |                    |                    |                    |                   | 40 (46)<br>2 (2)  |                    |                    |                   |                    |                    |                   |                    | 53 (30)<br>3 (1)  |                    |                  |                   |                  | 236 (34)<br>15 (2) |                    |                   |                 |          |  |
| 12 (852)  |                    | 356 (17)<br>9 (0) |                    |                    |                    | 81 (32)<br>8 (1)   |                   |                   |                    |                    |                   |                    |                    |                   |                    |                   |                    | 53 (23)<br>5 (1) |                   |                  |                    |                    |                   |                 |          |  |
| X (1116)  |                    |                   | 483 (21)<br>42 (1) |                    |                    |                    |                   |                   |                    |                    |                   |                    |                    |                   |                    |                   |                    |                  |                   |                  |                    |                    |                   |                 |          |  |
| 2 (2058)  |                    |                   |                    | 445 (36)<br>11 (0) |                    | 189 (77)<br>11 (4) |                   |                   | 170 (84)<br>13 (3) |                    |                   |                    |                    |                   |                    |                   |                    |                  |                   | 88 (48)<br>4 (2) | 215 (47)<br>12 (3) |                    | 140 (36)<br>2 (1) |                 |          |  |
| 11 (1877) | 27 (117)<br>4 (3)  |                   |                    |                    | 931 (70)<br>31 (2) | 56 (71)<br>2 (3)   |                   | 6 (49)<br>1 (1)   | 150 (51)<br>9 (2)  |                    |                   |                    |                    |                   |                    |                   |                    | 43 (50)<br>4 (2) |                   |                  |                    | 47 (24)<br>1 (1)   |                   |                 |          |  |
| 7 (2003)  |                    |                   |                    | 430 (68)<br>22 (3) | 2 (75)<br>1 (3)    |                    | 157 (52)<br>9 (2) |                   | 344 (81)<br>18 (3) |                    |                   |                    |                    |                   |                    |                   |                    |                  | 71 (46)<br>2 (2)  |                  |                    | 112 (35)<br>12 (1) |                   |                 |          |  |
| 1 (1504)  | 429 (93)<br>12 (3) |                   |                    |                    |                    | 382 (56)<br>16 (2) | 35 (46)<br>4 (2)  |                   |                    | 7 (41)<br>2 (2)    |                   |                    | 17 (12)<br>1 (0)   | 45 (30)<br>2 (1)  | 9 (15)<br>1 (1)    |                   |                    |                  |                   |                  |                    |                    |                   |                 |          |  |
| 17 (1157) |                    |                   |                    | 80 (39)<br>5 (1)   | 85 (43)<br>4 (2)   | 326 (35)<br>11 (1) | 113 (30)<br>3 (1) |                   |                    | 14 (31)<br>3 (1)   |                   | 10 (40)<br>1 (1)   |                    |                   | 23 (9)<br>2 (0)    |                   |                    |                  |                   |                  |                    |                    |                   | 18 (6)<br>1 (0) |          |  |
| 8 (1189)  | 36 (74)<br>1 (2)   |                   |                    | 166 (40)<br>6 (1)  |                    |                    | 298 (31)<br>8 (1) | 93 (27)<br>6 (1)  |                    |                    |                   |                    |                    |                   | 106 (24)<br>12 (1) | 47 (12)<br>4 (0)  |                    |                  | 4 (27)<br>1 (1)   |                  |                    | 5 (15)<br>1 (0)    |                   |                 |          |  |
| 5 (1478)  | 23 (92)<br>1 (3)   |                   | 2 (28)<br>1 (2)    |                    |                    | 50 (55)<br>1 (2)   |                   | 303 (33)<br>8 (1) |                    |                    | 189 (48)<br>5 (1) |                    |                    |                   |                    | 35 (15)<br>1 (1)  | 296 (40)<br>17 (2) |                  |                   |                  |                    | 20 (19)<br>3 (1)   |                   |                 |          |  |
| 13 (1012) | 16 (63)<br>2 (2)   |                   |                    |                    |                    | 120 (31)<br>8 (1)  |                   |                   |                    | 255 (27)<br>15 (1) |                   |                    |                    |                   |                    | 3 (20)<br>1 (1)   |                    | 21 (27)<br>1 (1) | 17 (23)<br>3 (1)  | 55 (23)<br>5 (1) |                    |                    |                   |                 |          |  |
| 19 (795)  |                    |                   |                    |                    |                    |                    |                   |                   |                    |                    | 252 (32)<br>4 (1) |                    |                    |                   |                    |                   |                    |                  |                   |                  | 207 (18)<br>5 (0)  | 64 (18)<br>5 (1)   |                   |                 |          |  |
| 16 (811)  | 3 (50)<br>1 (1)    |                   |                    |                    |                    |                    |                   | 81 (21)<br>4 (0)  |                    |                    |                   | 239 (28)<br>13 (1) | 4 (26)<br>1 (0)    |                   | 6 (16)<br>1 (1)    |                   |                    |                  |                   |                  |                    | 46 (10)<br>5 (0)   | 93 (4)<br>3 (0)   |                 |          |  |
| 10 (1205) |                    |                   |                    | 113 (41)<br>4 (1)  | 7 (45)<br>1 (2)    | 194 (37)<br>8 (1)  |                   |                   |                    |                    |                   | 258 (39)<br>7 (1)  |                    |                   |                    |                   |                    |                  | 78 (28)<br>3 (1)  |                  | 25 (15)<br>4 (0)   |                    | 36 (7)<br>2 (0)   |                 |          |  |
| 18 (628)  |                    |                   |                    |                    |                    | 11 (23)<br>1 (1)   |                   |                   |                    |                    | 185 (17)<br>5 (0) |                    |                    |                   | 165 (5)<br>8 (0)   |                   |                    |                  | 21 (14)<br>4 (0)  |                  |                    |                    |                   |                 |          |  |
| 15 (953)  |                    |                   |                    |                    |                    |                    |                   |                   |                    |                    | 77 (26)<br>5 (1)  |                    |                    | 157 (31)<br>3 (0) |                    | 187 (19)<br>6 (1) |                    |                  |                   |                  |                    | 175 (12)<br>5 (0)  |                   |                 |          |  |
| 14 (898)  | 2 (56)<br>1 (1)    | 151 (18)<br>6 (0) |                    |                    |                    |                    |                   | 3 (27)<br>1 (1)   |                    |                    |                   | 84 (31)<br>7 (1)   |                    |                   |                    | 77 (18)<br>3 (1)  | 146 (9)<br>12 (0)  |                  | 82 (21)<br>5 (1)  |                  |                    |                    |                   |                 |          |  |
| 3 (1237)  | 422 (77)<br>12 (2) |                   |                    |                    |                    |                    |                   |                   | 153 (28)<br>9 (1)  |                    |                   | 118 (42)<br>7 (2)  |                    |                   |                    | 28 (25)<br>3 (1)  | 20 (12)<br>1 (0)   |                  |                   |                  |                    |                    |                   |                 |          |  |
| 6 (1282)  | 5 (80)<br>1 (2)    |                   |                    |                    |                    | 81 (48)<br>4 (2)   |                   | 18 (29)<br>3 (1)  |                    |                    |                   | 134 (44)<br>7 (2)  | 204 (41)<br>10 (1) |                   |                    |                   |                    |                  | 253 (34)<br>7 (1) | 17 (30)<br>2 (1) |                    | 13 (17)<br>1 (1)   |                   |                 |          |  |
| 9 (1394)  |                    |                   |                    |                    | 60 (47)<br>4 (2)   |                    | 53 (43)<br>2 (2)  |                   |                    |                    |                   | 255 (57)<br>7 (2)  | 280 (48)<br>8 (2)  |                   |                    |                   |                    |                  |                   | 10 (37)<br>3 (2) |                    |                    | 196 (25)<br>7 (1) |                 |          |  |

Number of inter-chromosomal relations: 113 (17 on diagonal)

non-coding fraction conserved

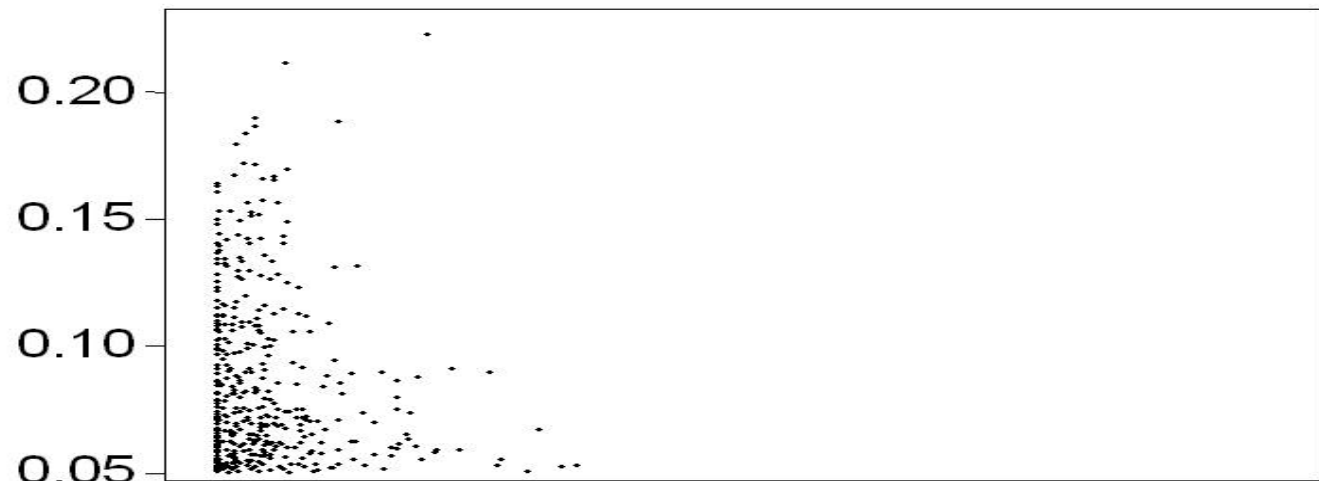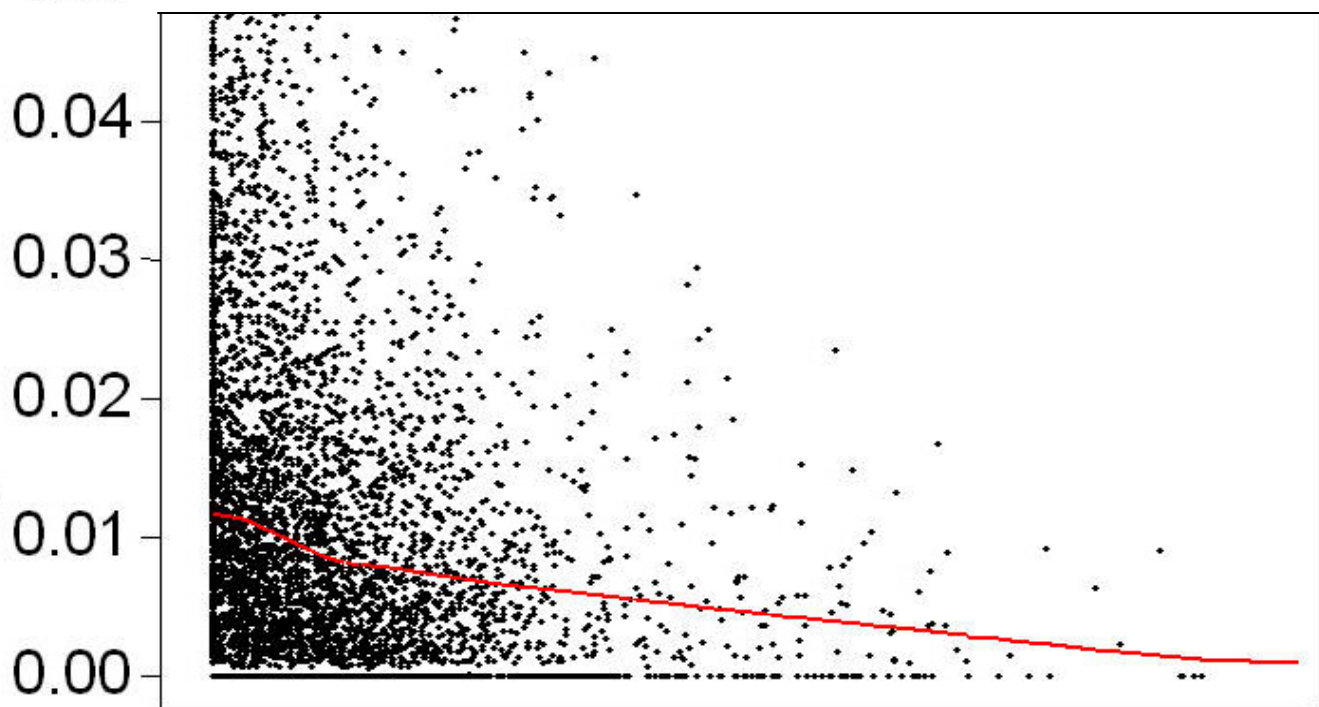

0.00

0.05

0.10

coding fraction

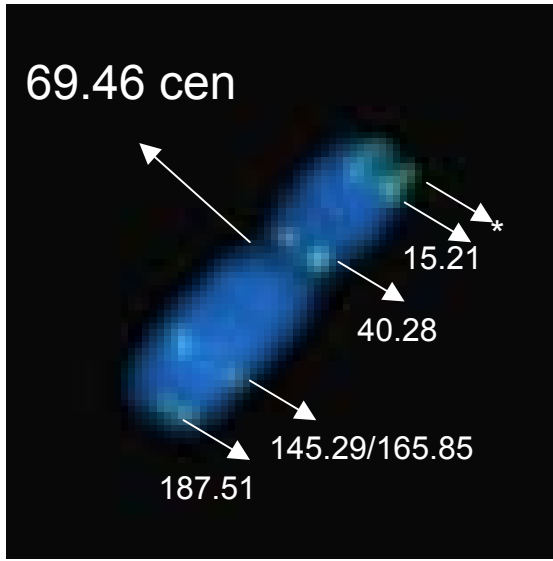

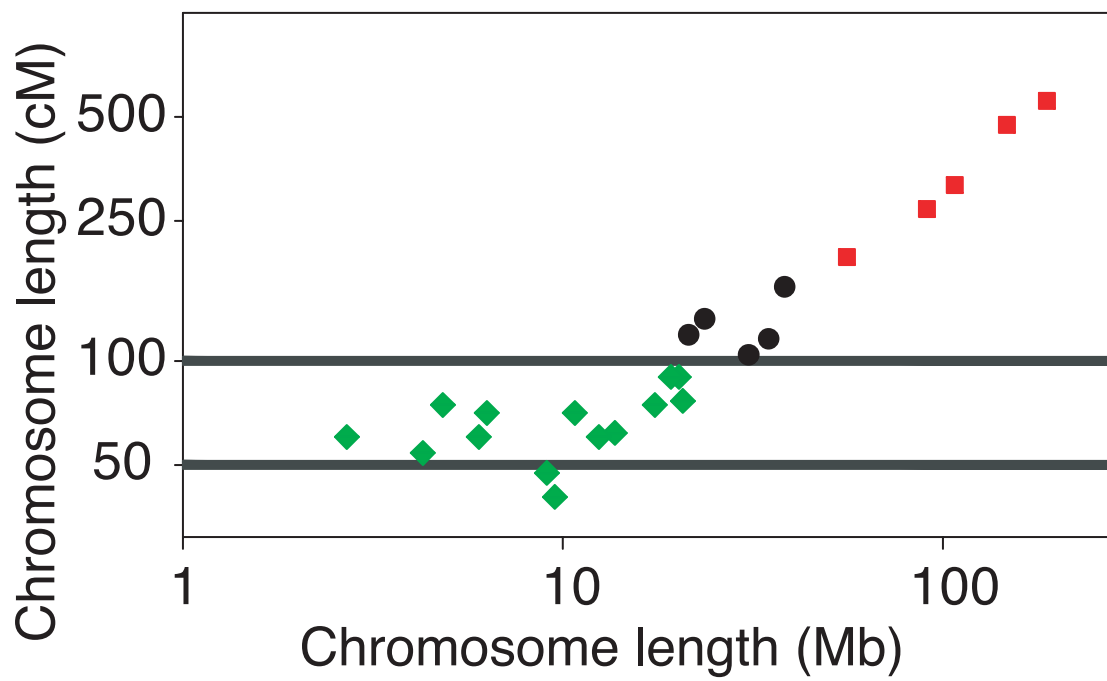

Supplement: 41586_2004_BFnature03154_MOESM3_ESM.pdf [file 41586_2004_BFnature03154_MOESM3_ESM.pdf]
